## Correction: A genetic variant in SLC28A3, rs56350726, is associated with progression to castration-resistant prostate cancer in a Korean population with metastatic prostate cancer

Jung Ki Jo<sup>1,\*</sup>, Jong Jin Oh<sup>2,\*</sup>, Yong Tae Kim<sup>1</sup>, Hong Sang Moon<sup>3</sup>, Hong Yong Choi<sup>3</sup>, Seunghyun Park<sup>4</sup>, Jin-Nyoung Ho<sup>5</sup>, Sungroh Yoon<sup>4</sup>, Hae Young Park<sup>1</sup> and Seok-Soo Byun<sup>2</sup>

<sup>1</sup> Department of Urology, Hanyang University Hospital, Seoul, Korea

<sup>2</sup> Department of Urology, Seoul National University College of Medicine, Seoul National University Bundang Hospital, Seongnam, Korea

<sup>3</sup> Department of Urology, Hanyang University Guri Hospital, Guri-si, Korea

<sup>4</sup> Department of Electrical and Computer Engineering, Seoul National University, Seoul, Korea

<sup>5</sup> Biomedical Research Institute, Seoul National University Bundang Hospital, Seongnam, Korea

\* These authors contributed equally to this work

**Published:** August 07, 2018

**Copyright:** Jo et al. This is an open-access article distributed under the terms of the Creative Commons Attribution License 3.0 (CC BY 3.0), which permits unrestricted use, distribution, and reproduction in any medium, provided the original author and source are credited.

**This article has been corrected:** The correct author name is given below:

**Jung Ki Jo**

Original article: Oncotarget. 2017; 8:96893-96902. <https://doi.org/10.18632/oncotarget.18298>
